# Supplementary material for: Sex Differences in the Effect of Type 2 Diabetes on Major Cardiovascular Diseases: Results from a Population-Based Study in Italy
Source: PubMed Central journal article supplement (PMC5338069; doi:10.1155/2017/6039356), 2017-02-20
Supplement: 6039356.f1.pdf [file 6039356.f1.pdf]

Annex1: N of event and five-yr-incidence rate ratios (IRR) with 95% Confidence Intervals (95% CI) by type of event, sex and age class.

| Age class | Stroke |     |                    |        |     |                    | Myocardial infarction |     |                    |        |     |                    | Heart failure |     |                    |        |     |                     |
|-----------|--------|-----|--------------------|--------|-----|--------------------|-----------------------|-----|--------------------|--------|-----|--------------------|---------------|-----|--------------------|--------|-----|---------------------|
|           | Men    |     |                    | Women  |     |                    | Men                   |     |                    | Women  |     |                    | Men           |     |                    | Women  |     |                     |
|           | No T2D | T2D | IRR 95%CI          | No T2D | T2D | IRR 95%CI          | No T2D                | T2D | IRR 95%CI          | No T2D | T2D | IRR 95%CI          | No T2D        | T2D | IRR 95%CI          | No T2D | T2D | IRR 95%CI           |
| 30-34     | 16     | 0   | -                  | 7      | 0   | -                  | 5                     | 0   | -                  | 1      | 0   | -                  | 5             | 0   | -                  | 0      | 0   | -                   |
| 35-39     | 24     | 1   | 4.64<br>0.61-35.01 | 15     | 0   | -                  | 30                    | 1   | 4.35<br>0.59-32.31 | 7      | 0   | -                  | 4             | 0   | -                  | 2      | 0   | -                   |
| 40-44     | 36     | 3   | 4.95<br>1.50-16.38 | 34     | 2   | 4.18<br>0.98-17.9  | 62                    | 6   | 5.72<br>2.44-13.40 | 16     | 0   | -                  | 16            | 1   | 3.53<br>0.46-27.28 | 2      | 0   | -                   |
| 45-49     | 48     | 6   | 3.42<br>1.45-8.07  | 42     | 3   | 4.34<br>1.34-14.11 | 118                   | 10  | 2.22<br>1.16-4.25  | 39     | 5   | 6.67<br>2.61-17.09 | 22            | 5   | 5.92<br>2.21-15.82 | 10     | 1   | 4.69<br>0.59-37.31  |
| 50-54     | 83     | 15  | 2.68<br>1.54-4.67  | 49     | 9   | 5.37<br>2.63-10.99 | 160                   | 27  | 2.41<br>1.60-3.63  | 39     | 6   | 4.54<br>1.91-10.77 | 22            | 12  | 7.73<br>3.81-15.72 | 6      | 3   | 14.76<br>3.67-59.30 |
| 55-59     | 96     | 27  | 2.64<br>1.72-4.05  | 60     | 13  | 3.55<br>1.94-6.50  | 172                   | 49  | 2.75<br>2.00-3.77  | 51     | 17  | 5.77<br>3.32-10.01 | 42            | 16  | 3.61<br>2.02-6.43  | 8      | 11  | 21.20<br>8.50-53.02 |
| 60-64     | 138    | 53  | 2.41<br>1.75-3.31  | 70     | 16  | 2.33<br>1.35-4.01  | 215                   | 56  | 1.66<br>1.24-2.23  | 68     | 29  | 4.43<br>2.87-6.86  | 43            | 44  | 6.51<br>4.28-9.92  | 20     | 17  | 8.93<br>4.67-17.08  |
| 65-69     | 170    | 68  | 1.99<br>1.50-2.63  | 120    | 29  | 1.78<br>1.18-2.67  | 220                   | 69  | 1.57<br>1.20-2.06  | 80     | 32  | 3.06<br>2.03-4.62  | 70            | 51  | 3.60<br>2.51-5.17  | 50     | 26  | 3.88<br>2.41-6.23   |
| 70-74     | 250    | 113 | 1.91<br>1.53-2.39  | 191    | 62  | 2.01<br>1.51-2.69  | 226                   | 93  | 1.74<br>1.36-2.21  | 104    | 39  | 2.32<br>1.60-3.35  | 107           | 82  | 3.23<br>2.42-4.31  | 89     | 49  | 3.35<br>2.36-4.75   |
| 75-79     | 278    | 130 | 1.86<br>1.51-2.29  | 307    | 91  | 1.62<br>1.28-2.05  | 198                   | 77  | 1.52<br>1.17-1.98  | 133    | 50  | 2.04<br>1.48-2.83  | 207           | 133 | 2.56<br>2.06-3.18  | 194    | 78  | 2.18<br>1.68-2.84   |
| 80-84     | 315    | 101 | 1.26<br>1.00-1.57  | 406    | 116 | 1.60<br>1.30-1.96  | 184                   | 71  | 1.53<br>1.16-2.00  | 175    | 63  | 2.00<br>1.50-2.66  | 278           | 137 | 1.98<br>1.62-2.43  | 337    | 121 | 2.00<br>1.63-2.47   |
| Total     | 1454   | 517 | 1.86<br>1.68-2.06  | 1301   | 341 | 1.81<br>1.61-2.04  | 1590                  | 459 | 1.78<br>1.60-2.00  | 713    | 241 | 2.58<br>2.22-3.00  | 816           | 481 | 2.78<br>2.48-3.12  | 718    | 306 | 2.59<br>2.27-2.97   |

T2D = type 2 diabetes; IRR = calculated using Poisson model, adjusted for age and foreign status. People without type 2 diabetes was used as reference
